# Supplementary material
Source: publisher figshare collection journal article supplement (https://karger.figshare.com/ndownloader/files/24233696)
Supplement: Supplementary file 1 [file 24233696]

**Online Supplemental 1**

**Prediction of radio-resistant prostate cancer based on differentially expressed proteins**

Tim Nestler1, Maike Wittersheim2, Stephan Schaefer2, Martin Hellmich3, David Pfister1, Margarete Odenthal2, Melanie von Brandenstein1, Reinhard Buettner2, Axel Heidenreich1

1Department of Urology, University Hospital of Cologne, Cologne, Germany

2Institute of Pathology, University Hospital of Cologne, Cologne, Germany

3Institute of Medical Statistics and Computational Biology, University of Cologne, Cologne, Germany

**Corresponding author:**

Tim Nestler, M.D.

Department of Urology, Uro-Oncology, Robot Assisted and Reconstructive Urologic Surgery University Hospital Cologne

Kerpener Straße 62

50937 Cologne, Germany

Telephone: +49 221 478 82108

Fax: +49 221 478 82372

E-mail: tim.nestler@uk-koeln.de

ORCID-ID: 0000‐0001‐6033‐6364

**Online Supplemental 1**

## Immunohistochemistry

For tissue microarrays (TMAs) H&E slides of the prostatectomy specimens of each patient were screened, tumor areas were marked. Gleason score was assigned and areas with different Gleason patterns were identified. TMA were constructed with tissue cylinders, each with a diameter of 1.2mm, punched from selected tumor tissue blocks and embedded in recipient paraffin blocks. In PRP 6 cores from different tumor areas were punched out, in SRP 3 cores were selected. For immunostaining, 3-μm sections of the resulting TMA blocks were transferred to an adhesive coated slide system (Surgipath X-tra Adhesive, Leica Biosystems).

Immunohistochemistry was performed for AKR1C3 [[1](#_ENREF_1)], ALDOA [[2](#_ENREF_2)], AR [[3-5](#_ENREF_3)], BCL-2 [[6](#_ENREF_6)], BIRC5 [[7](#_ENREF_7)], CAV-1 [[8](#_ENREF_8)], CLU [[9](#_ENREF_9)], CXCR4 [[10](#_ENREF_10)], Cyclin D1 [[11](#_ENREF_11)], DAB2IP [[12](#_ENREF_12)], HBP1 [[13](#_ENREF_13)], HIF-1a [[14](#_ENREF_14)], LDH Isoenzyme V [[15](#_ENREF_15)], PIK3R1 [[16](#_ENREF_16)], and PTEN [[17](#_ENREF_17)] using an automated staining system (Lab Vision Autostainer 480 S, Thermo Scientific, or Bond-Max, Leica Microsystems; **Table 1 suppl.**) according to the manufacturer's protocols. Primary and secondary antibodies are listed in **Table 1 supll.** including dilution, pretreatment, company and catalogue number.

The prerequisite for inclusion in the analysis was a homogenous staining intensity. Semiquantitative assessment was applied for cytoplasmic staining considering 0 (negative, <25%); 1 (weak, 25–50%); 2 (moderate, 50–70%); 3 (strong, >75%). Nuclear staining was distinguished as negative=0 or positive=1. In general, the highest staining intensity was reported. Evaluation of tissue staining was performed by light microscopy (DM2500, Leica, Germany) by two experienced pathologists (SS, MW) who were blinded concerning prior treatment. If scoring discrepancies occurred the cases were discussed for consensus. In a second analysis the SRP group was compared to the PRP group only considering the highest Gleason pattern. For publication slides were scanned (NanoZommer S360, Hamamatsu, Hamamatsu City, Japan) and processed using NDP.viewer 2 (NanoZommer S360, Hamamatsu, Hamamatsu City, Japan).

## ELISA in serum samples

For enzyme-linked immunosorbent assay (ELISA) serum samples of patients immediately prior PRP (low-risk n=11, high-risk n=24), SRP (n=24) and controls (n=7) without malignant disease were identified. Blood samples were collected in serum separation tubes (S-Monovette® 7.5ml Z-Gel, Sarstedt AG, Nürnbrecht, Germany) that were kept at room temperature for approximately 60 min to allow for complete coagulation after blood aspiration. The samples were then centrifuged for 10 min at 2,500 x g to separate serum and aliquots were frozen at -80°C.

96 well plates were washed twice with phosphate buffered saline (PBS) and 50µL of patient serum was added and incubated for 1 hour at room temperature. The washing step was repeated 3x with PBS followed by an incubation step with the primary antibody (AR, AKR1C3; 1:500) for 1 hour at room temperature. After washing twice the secondary antibody (anti-mouse IgG; 1:5000) was added and incubated for 1 hour at room temperature. Finally the ELISA was washed twice with PBS, 50µL substrate solution (Invitrogen Corporation) was added and the reaction was stopped exactly after 10min with a stopping solution (Bethyl Laboratories, Inc., Montgomery, TX, USA). For ELISA analysis the reader was used at 450nm.

## Statistical analysis

Values were expressed as median plus interquartile range. Continuous data were compared using the two-tailed Mann–Whitney U test while chi-squared test was used to compare categorical parameters. One-way ANOVA and Bonferroni correction were used to analyze the different ELISA groups.

Kruskal-Wallis test was used for multiple group comparison in order to identify radio-recurrent PCA patients with similar protein expression as patients in the subgroup of primary Gleason high-risk PCA. The test statistics were adjusted for ties. Dunn-Bonferroni-Test was used as post hoc test to analyze all pairs of each analysis to detect intergroup differences. Cohen’s d was used to calculate the intergroup effect size [[18](#_ENREF_18)]. Correlations of ≤0.10, 0.20, and ≥0.30 were considered as relatively small, typical, and relatively large [[19](#_ENREF_19)]. Values <0.1 indicate group equalities, values >0.3 indicate differences between the groups. All tests were 2-sided. A p-value of <0.05 was considered significant. Statistical calculations were performed using SPSS 24.0 (SPSS) and Prism 7 (GraphPad Software).

# References

1. Sun SQ, Gu X, Gao XS, Li Y, Yu H, Xiong W, Yu H, Wang W, Li Y, Teng Y, Zhou D (2016) Overexpression of AKR1C3 significantly enhances human prostate cancer cells resistance to radiation. Oncotarget 7 (30):48050-48058. doi:10.18632/oncotarget.10347

2. Chang L, Ni J, Beretov J, Wasinger VC, Hao J, Bucci J, Malouf D, Gillatt D, Graham PH, Li Y (2017) Identification of protein biomarkers and signaling pathways associated with prostate cancer radioresistance using label-free LC-MS/MS proteomic approach. Sci Rep 7:41834. doi:10.1038/srep41834

3. Spratt DE, Evans MJ, Davis BJ, Doran MG, Lee MX, Shah N, Wongvipat J, Carnazza KE, Klee GG, Polkinghorn W, Tindall DJ, Lewis JS, Sawyers CL (2015) Androgen Receptor Upregulation Mediates Radioresistance after Ionizing Radiation. Cancer Res 75 (22):4688-4696. doi:10.1158/0008-5472.CAN-15-0892

4. Paximadis P, Najy AJ, Snyder M, Kim HR (2016) The interaction between androgen receptor and PDGF-D in the radiation response of prostate carcinoma. Prostate 76 (6):534-542. doi:10.1002/pros.23135

5. Zhang X, Liu N, Shao Z, Qiu H, Yao H, Ji J, Wang J, Lu W, Chen RC, Zhang L (2017) Folate-targeted nanoparticle delivery of androgen receptor shRNA enhances the sensitivity of hormone-independent prostate cancer to radiotherapy. Nanomedicine 13 (4):1309-1321. doi:10.1016/j.nano.2017.01.015

6. Anai S, Shiverick K, Medrano T, Nakamura K, Goodison S, Brown BD, Rosser CJ (2007) Downregulation of BCL-2 induces downregulation of carbonic anhydrase IX, vascular endothelial growth factor, and pAkt and induces radiation sensitization. Urology 70 (4):832-837. doi:10.1016/j.urology.2007.06.1118

7. Zhang M, Ho A, Hammond EH, Suzuki Y, Bermudez RS, Lee RJ, Pilepich M, Shipley WU, Sandler H, Khor LY, Pollack A, Chakravarti A (2009) Prognostic value of survivin in locally advanced prostate cancer: study based on RTOG 8610. Int J Radiat Oncol Biol Phys 73 (4):1033-1042. doi:10.1016/j.ijrobp.2008.06.1489

8. Klein D, Schmitz T, Verhelst V, Panic A, Schenck M, Reis H, Drab M, Sak A, Herskind C, Maier P, Jendrossek V (2015) Endothelial Caveolin-1 regulates the radiation response of epithelial prostate tumors. Oncogenesis 4:e148. doi:10.1038/oncsis.2015.9

9. Zellweger T, Kiyama S, Chi K, Miyake H, Adomat H, Skov K, Gleave ME (2003) Overexpression of the cytoprotective protein clusterin decreases radiosensitivity in the human LNCaP prostate tumour model. BJU Int 92 (4):463-469

10. Okera M, Bae K, Bernstein E, Cheng L, Lawton C, Wolkov H, Pollack A, Dicker A, Sandler H, Sweeney CJ (2011) Evaluation of nuclear factor kappaB and chemokine receptor CXCR4 co-expression in patients with prostate cancer in the Radiation Therapy Oncology Group (RTOG) 8610. BJU Int 108 (2 Pt 2):E51-58. doi:10.1111/j.1464-410X.2010.09884.x

11. Marampon F, Gravina G, Ju X, Vetuschi A, Sferra R, Casimiro M, Pompili S, Festuccia C, Colapietro A, Gaudio E, Di Cesare E, Tombolini V, Pestell RG (2016) Cyclin D1 silencing suppresses tumorigenicity, impairs DNA double strand break repair and thus radiosensitizes androgen-independent prostate cancer cells to DNA damage. Oncotarget 7 (5):5383-5400. doi:10.18632/oncotarget.6579

12. Yang C, He H, Zhang T, Chen Y, Kong Z (2016) Decreased DAB2IP gene expression, which could be induced by fractionated irradiation, is associated with resistance to gammarays and alphaparticles in prostate cancer cells. Mol Med Rep 14 (1):567-573. doi:10.3892/mmr.2016.5281

13. Chen Y, Wang Y, Yu Y, Xu L, Zhang Y, Yu S, Li G, Zhang Z (2016) Transcription Factor HBP1 Enhances Radiosensitivity by Inducing Apoptosis in Prostate Cancer Cell Lines. Anal Cell Pathol (Amst) 2016:7015659. doi:10.1155/2016/7015659

14. Zhang Q, Zhang C, Yang X, Yang B, Wang J, Kang Y, Wang Z, Li D, Huang G, Ma Z, Sun X, Cai J, Tao G, Dai S, Mao W, Ma J (2014) Berberine inhibits the expression of hypoxia induction factor-1alpha and increases the radiosensitivity of prostate cancer. Diagn Pathol 9:98. doi:10.1186/1746-1596-9-98

15. Koukourakis MI, Giatromanolaki A, Panteliadou M, Pouliliou SE, Chondrou PS, Mavropoulou S, Sivridis E (2014) Lactate dehydrogenase 5 isoenzyme overexpression defines resistance of prostate cancer to radiotherapy. Br J Cancer 110 (9):2217-2223. doi:10.1038/bjc.2014.158

16. Ni J, Cozzi P, Hao J, Beretov J, Chang L, Duan W, Shigdar S, Delprado W, Graham P, Bucci J, Kearsley J, Li Y (2013) Epithelial cell adhesion molecule (EpCAM) is associated with prostate cancer metastasis and chemo/radioresistance via the PI3K/Akt/mTOR signaling pathway. Int J Biochem Cell Biol 45 (12):2736-2748. doi:10.1016/j.biocel.2013.09.008

17. Zafarana G, Ishkanian AS, Malloff CA, Locke JA, Sykes J, Thoms J, Lam WL, Squire JA, Yoshimoto M, Ramnarine VR, Meng A, Ahmed O, Jurisica I, Milosevic M, Pintilie M, van der Kwast T, Bristow RG (2012) Copy number alterations of c-MYC and PTEN are prognostic factors for relapse after prostate cancer radiotherapy. Cancer 118 (16):4053-4062. doi:10.1002/cncr.26729

18. Cohen J (1988) Statistical Power 2nd Ed. Lawrence Erlbaum Associates,

19. Sawilowsky SS (2009) New Effect Size Rules of Thumb. Journal of Modern Applied Statistical Methods 8 (2):**597-599**. doi:10.22237/jmasm/1257035100
